# Supplementary material
Source: Springer Nature journal article supplement (https://www.springermedizin.de/resource/supplementary/13075_2010_2966_MOESM3_ESM.pdf/9693296)

C-reactive protein

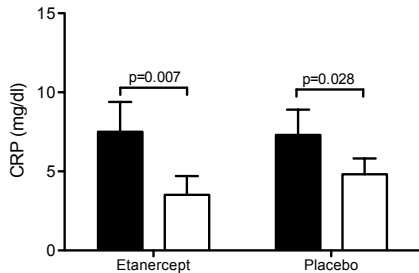

VAS physician

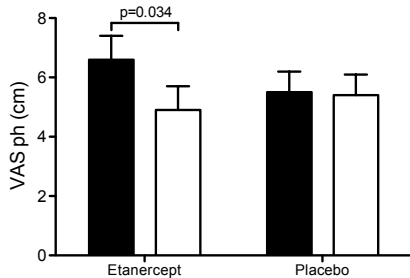

Elevation of arms

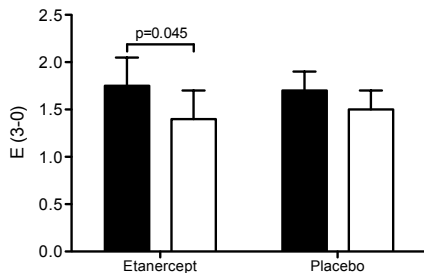

Erythrocyte sedimentation rate

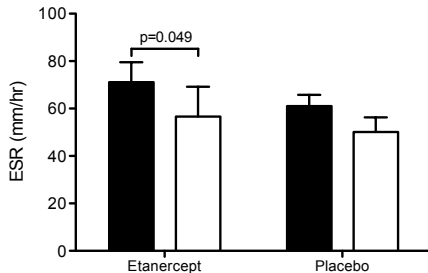

Supplement: MOESM3 [file 9693296]
